# Supplementary material
Source: PubMed Central journal article supplement (PMC2865140)

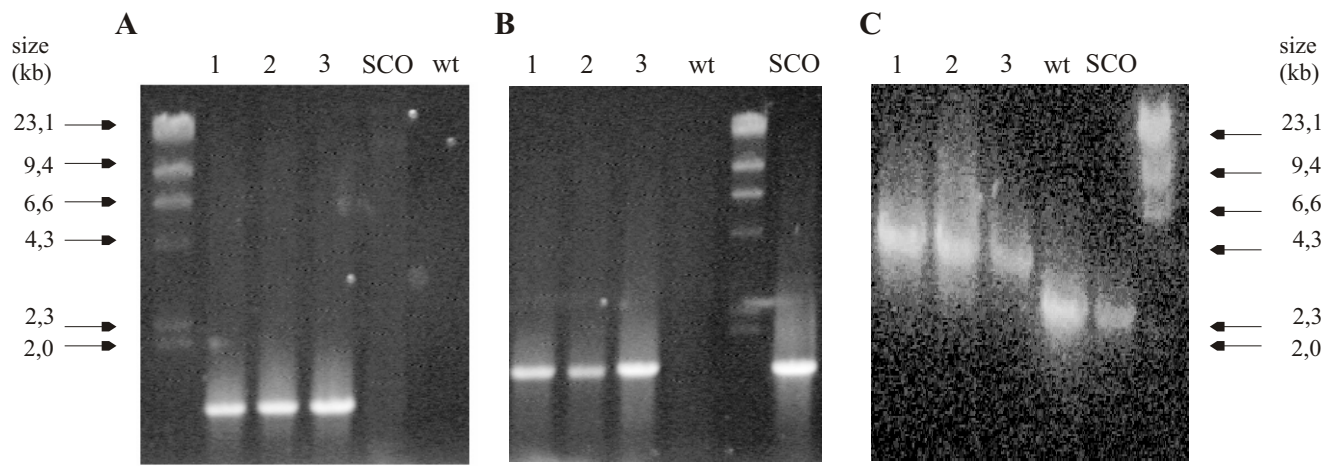

Fig. S1

Supplement: NIHMS198978-supplement-Fig__S1.pdf [file NIHMS198978-supplement-Fig__S1.pdf]

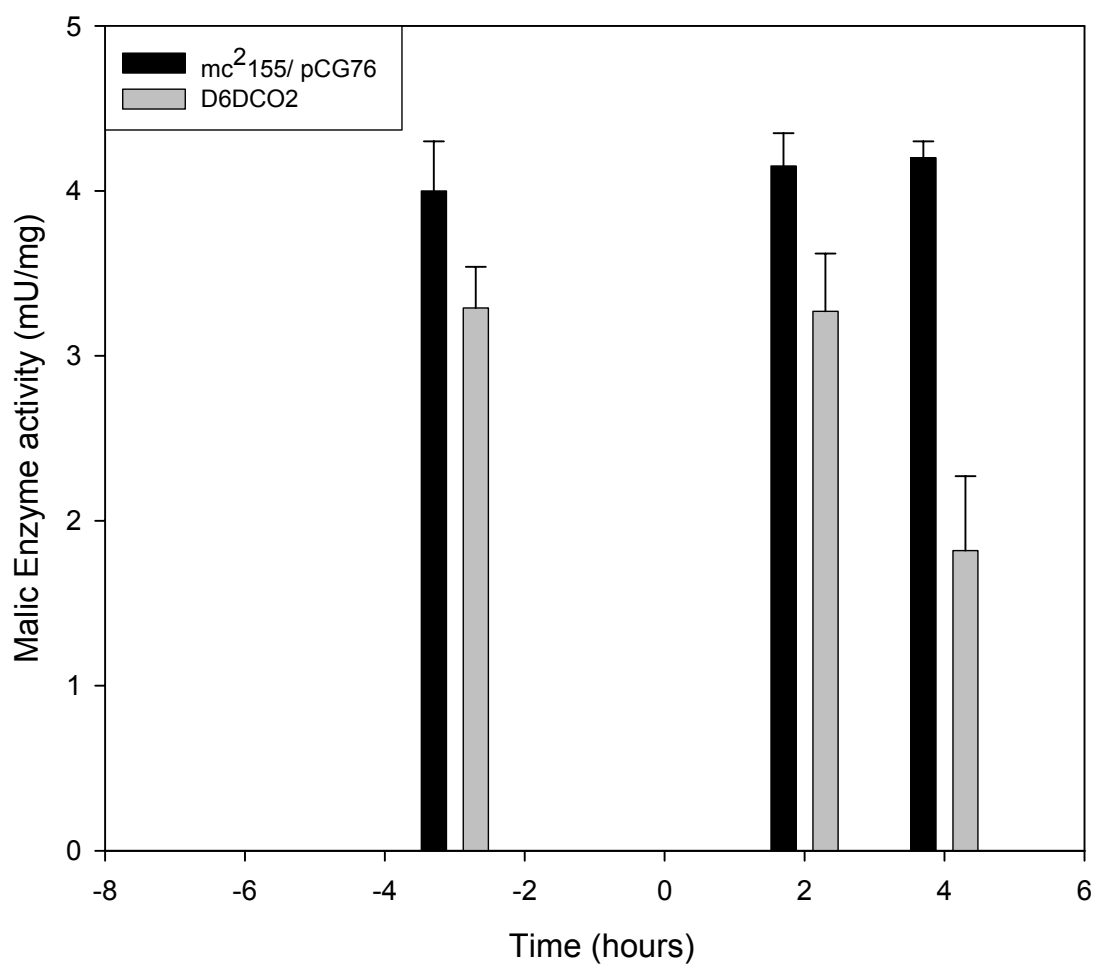

Figure S2

Supplement: NIHMS198978-supplement-Fig__S2.pdf [file NIHMS198978-supplement-Fig__S2.pdf]

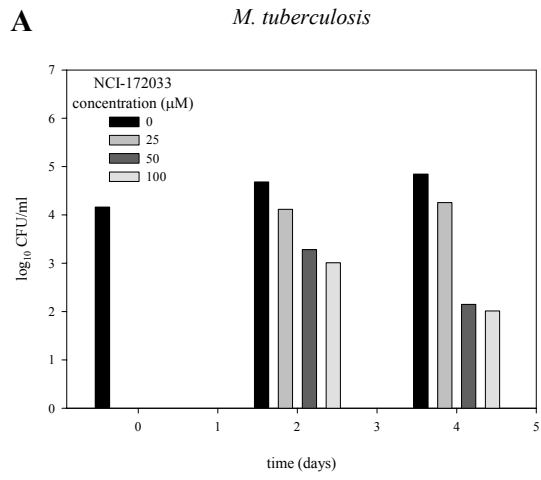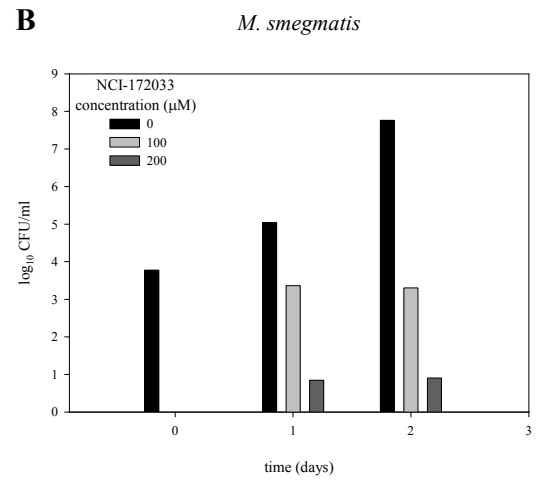

Fig. S3

Supplement: NIHMS198978-supplement-Fig__S3.pdf [file NIHMS198978-supplement-Fig__S3.pdf]
